# Supplementary material
Source: MDPI journal article supplement (https://www.mdpi.com/2079-6412/12/1/104)
Supplement: s1 [file s1]

# Multi-Response Optimization of Surface Grinding Process Parameters of AISI 4140 Alloy Steel Using Response Surface Methodology and Desirability Function under Dry and Wet Conditions

Rakesh Roy <sup>1</sup>, Sourav Kumar Ghosh <sup>2</sup>, Tanvir Ibna Kaisar <sup>3</sup>, Tazim Ahmed <sup>1</sup>, Shakhawat Hossain <sup>1</sup>, Muhammad Aslam <sup>4</sup>, Mosab Kaseem <sup>5,\*</sup> and Md Mahfuzur Rahman <sup>1,\*</sup>

<sup>1</sup> Department of Industrial and Production Engineering, Jashore University of Science and Technology, Jashore 7408, Bangladesh; rakeshroy996@gmail.com (R.R.); tazim\_ipe@just.edu.bd (T.A.); shakhawat.ipe@just.edu.bd (S.H.)

<sup>2</sup> Department of Industrial and Production Engineering, Bangladesh University of Textile, Dhaka 1208, Bangladesh; sourav@butex.edu.bd

<sup>3</sup> Department of Industrial and Production Engineering, Bangladesh University of Engineering and Technology, Dhaka 1000, Bangladesh; tanvirkaisar@ipe.buet.ac.bd

<sup>4</sup> Department of Chemical Engineering, COMSATS University Islamabad, Lahore 54000, Pakistan; maslam@cuilahore.edu.pk

<sup>5</sup> Department of Nanotechnology and Advanced Materials Engineering, Sejong University, Seoul 05006, Korea

\* Correspondence: mosabkaseem@sejong.ac.kr (M.K.); mrahman.ipe@just.edu.bd (M.M.R.)

## 1. Regression Analysis

**Table S1.** Specifications of the workpiece and wheel used in the experiment.

| Workpiece Specification |    | Wheel Specification  |       |
|-------------------------|----|----------------------|-------|
| Length (mm)             | 72 | Wheel dia (in)       | 14    |
| Width (mm)              | 37 | Wheel dia (mm)       | 355.6 |
|                         |    | Wheel thickness (in) | 1.5   |

**Table S2.** Input parameters, their level and output units of each parameter.

| Input Parameters   | Levels                       | Output |
|--------------------|------------------------------|--------|
| Cross-feed         | 3.6                          | MRR    |
| Workpiece velocity | 5.12                         |        |
| Wheel velocity     | 15.25                        |        |
| Depth of cut       | 0.07, 0.08, 0.09, 0.095, 0.1 | Temp.  |

**Table S3.** Formula for calculating wheel velocity and MRR.

| Formula                                                                             |
|-------------------------------------------------------------------------------------|
| Wheel velocity (Vc) = $\pi \times \text{Wheel Dia} \times \text{Spindle Speed (N)}$ |
| MRR = $Vc \times \text{Depth of Cut} \times \text{Crossfeed}$                       |

The thermocouple measures the EMF generated due to the presence of temperature gradient during machining which is transmitted through the thermocouple and is displayed at the digital multimeter. This EMF will be converted to the temperature using the following equation to get the elevated temperature at the contact zone of the grinding wheel and the workpiece:

$$\theta(^{\circ}\text{C}) = 75.28 + 63.05v(mV) - 0.57v^2(mV) \quad (\text{S1})$$

**Table S4.** Raw data for the regression analysis under dry condition.

| Dry condition             |                                         |                                   |                                |                           |                                       |                                     |
|---------------------------|-----------------------------------------|-----------------------------------|--------------------------------|---------------------------|---------------------------------------|-------------------------------------|
| Cross-feed,<br>$f_b$ (mm) | Workpiece<br>velocity,<br>$v_w$ (m/min) | Wheel<br>velocity,<br>$v_s$ (m/s) | Depth<br>of cut,<br>$a_p$ (mm) | Multimeter<br>reading(mV) | Temperature<br>( $^{\circ}\text{C}$ ) | MRR<br>( $\text{mm}^3/\text{min}$ ) |
| 3                         | 5                                       | 15                                | 0.07                           | 2.1                       | 205.1713                              | 1050                                |
| 3                         | 5                                       | 15                                | 0.08                           | 2.2                       | 211.2312                              | 1200                                |
| 3                         | 5                                       | 15                                | 0.09                           | 2.5                       | 229.3425                              | 1350                                |
| 3                         | 5                                       | 15                                | 0.095                          | 3                         | 259.3                                 | 1425                                |
| 3                         | 5                                       | 15                                | 0.1                            | 3.8                       | 306.6392                              | 1500                                |
| 3                         | 5                                       | 25                                | 0.07                           | 2.3                       | 217.2797                              | 1050                                |
| 3                         | 5                                       | 25                                | 0.08                           | 2.4                       | 223.3168                              | 1200                                |
| 3                         | 5                                       | 25                                | 0.09                           | 2.9                       | 253.3313                              | 1350                                |
| 3                         | 5                                       | 25                                | 0.095                          | 3.3                       | 277.1377                              | 1425                                |
| 3                         | 5                                       | 25                                | 0.1                            | 3.7                       | 300.7617                              | 1500                                |
| 3                         | 12                                      | 15                                | 0.07                           | 1.8                       | 186.9232                              | 2520                                |
| 3                         | 12                                      | 15                                | 0.08                           | 1.95                      | 196.060075                            | 2880                                |
| 3                         | 12                                      | 15                                | 0.09                           | 2.35                      | 220.299675                            | 3240                                |
| 3                         | 12                                      | 15                                | 0.095                          | 2.7                       | 241.3597                              | 3420                                |
| 3                         | 12                                      | 15                                | 0.1                            | 3.5                       | 288.9725                              | 3600                                |
| 3                         | 12                                      | 25                                | 0.07                           | 2                         | 199.1                                 | 2520                                |
| 3                         | 12                                      | 25                                | 0.08                           | 2.25                      | 214.256875                            | 2880                                |
| 3                         | 12                                      | 25                                | 0.09                           | 2.6                       | 235.3568                              | 3240                                |
| 3                         | 12                                      | 25                                | 0.095                          | 2.97                      | 257.510587                            | 3420                                |
| 3                         | 12                                      | 25                                | 0.1                            | 3.73                      | 302.526147                            | 3600                                |
| 6                         | 5                                       | 15                                | 0.07                           | 2.25                      | 214.256875                            | 2100                                |
| 6                         | 5                                       | 15                                | 0.08                           | 2.35                      | 220.299675                            | 2400                                |
| 6                         | 5                                       | 15                                | 0.09                           | 2.55                      | 232.351075                            | 2700                                |
| 6                         | 5                                       | 15                                | 0.095                          | 3.06                      | 262.875748                            | 2850                                |
| 6                         | 5                                       | 15                                | 0.1                            | 3.92                      | 313.677152                            | 3000                                |
| 6                         | 5                                       | 25                                | 0.07                           | 2.43                      | 225.125707                            | 2100                                |
| 6                         | 5                                       | 25                                | 0.08                           | 2.51                      | 229.944443                            | 2400                                |
| 6                         | 5                                       | 25                                | 0.09                           | 3.03                      | 261.088387                            | 2700                                |
| 6                         | 5                                       | 25                                | 0.095                          | 3.45                      | 286.018075                            | 2850                                |
| 6                         | 5                                       | 25                                | 0.1                            | 3.81                      | 307.226323                            | 3000                                |
| 6                         | 12                                      | 15                                | 0.07                           | 1.88                      | 191.799392                            | 5040                                |
| 6                         | 12                                      | 15                                | 0.08                           | 2.09                      | 204.564683                            | 5760                                |
| 6                         | 12                                      | 15                                | 0.09                           | 2.4                       | 223.3168                              | 6480                                |
| 6                         | 12                                      | 15                                | 0.095                          | 2.81                      | 247.949723                            | 6840                                |
| 6                         | 12                                      | 15                                | 0.1                            | 3.55                      | 291.924075                            | 7200                                |
| 6                         | 12                                      | 25                                | 0.07                           | 2.09                      | 204.564683                            | 5040                                |
| 6                         | 12                                      | 25                                | 0.08                           | 2.15                      | 208.202675                            | 5760                                |
| 6                         | 12                                      | 25                                | 0.09                           | 2.6                       | 235.3568                              | 6480                                |
| 6                         | 12                                      | 25                                | 0.095                          | 2.99                      | 258.703643                            | 6840                                |
| 6                         | 12                                      | 25                                | 0.1                            | 3.7                       | 300.7617                              | 7200                                |

**Table S5.** Raw data for the regression analysis under wet condition.

| Wet condition             |                                         |                                   |                                |                               |                      |                               |
|---------------------------|-----------------------------------------|-----------------------------------|--------------------------------|-------------------------------|----------------------|-------------------------------|
| Cross-feed,<br>$f_b$ (mm) | Workpiece<br>velocity,<br>$v_w$ (m/min) | Wheel<br>velocity,<br>$v_s$ (m/s) | Depth<br>of cut,<br>$a_p$ (mm) | Multimeter<br>reading<br>(mV) | Temperatur<br>e (°C) | MRR<br>(mm <sup>3</sup> /min) |
| 3                         | 5                                       | 15                                | 0.07                           | 0.7                           | 119.1357             | 1050                          |
| 3                         | 5                                       | 15                                | 0.08                           | 0.8                           | 125.3552             | 1200                          |
| 3                         | 5                                       | 15                                | 0.09                           | 0.9                           | 131.5633             | 1350                          |
| 3                         | 5                                       | 15                                | 0.095                          | 1.1                           | 143.9453             | 1425                          |
| 3                         | 5                                       | 15                                | 0.1                            | 1.3                           | 156.2817             | 1500                          |
| 3                         | 5                                       | 25                                | 0.07                           | 0.75                          | 122.246875           | 1050                          |
| 3                         | 5                                       | 25                                | 0.08                           | 0.82                          | 126.597732           | 1200                          |
| 3                         | 5                                       | 25                                | 0.09                           | 0.89                          | 130.943003           | 1350                          |
| 3                         | 5                                       | 25                                | 0.095                          | 1.3                           | 156.2817             | 1425                          |
| 3                         | 5                                       | 25                                | 0.1                            | 1.5                           | 168.5725             | 1500                          |
| 3                         | 12                                      | 15                                | 0.07                           | 0.55                          | 109.785075           | 2520                          |
| 3                         | 12                                      | 15                                | 0.08                           | 0.62                          | 114.151892           | 2880                          |
| 3                         | 12                                      | 15                                | 0.09                           | 0.75                          | 122.246875           | 3240                          |
| 3                         | 12                                      | 15                                | 0.095                          | 1.05                          | 140.854075           | 3420                          |
| 3                         | 12                                      | 15                                | 0.1                            | 1.1                           | 143.9453             | 3600                          |
| 3                         | 12                                      | 25                                | 0.07                           | 0.6                           | 112.9048             | 2520                          |
| 3                         | 12                                      | 25                                | 0.08                           | 0.65                          | 116.021675           | 2880                          |
| 3                         | 12                                      | 25                                | 0.09                           | 0.85                          | 128.460675           | 3240                          |
| 3                         | 12                                      | 25                                | 0.095                          | 1.15                          | 147.033675           | 3420                          |
| 3                         | 12                                      | 25                                | 0.1                            | 1.2                           | 150.1192             | 3600                          |
| 6                         | 5                                       | 15                                | 0.07                           | 0.7                           | 119.1357             | 2100                          |
| 6                         | 5                                       | 15                                | 0.08                           | 0.8                           | 125.3552             | 2400                          |
| 6                         | 5                                       | 15                                | 0.09                           | 0.9                           | 131.5633             | 2700                          |
| 6                         | 5                                       | 15                                | 0.095                          | 1.1                           | 143.9453             | 2850                          |
| 6                         | 5                                       | 15                                | 0.1                            | 1.3                           | 156.2817             | 3000                          |
| 6                         | 5                                       | 25                                | 0.07                           | 0.75                          | 122.246875           | 2100                          |
| 6                         | 5                                       | 25                                | 0.08                           | 0.82                          | 126.597732           | 2400                          |
| 6                         | 5                                       | 25                                | 0.09                           | 0.89                          | 130.943003           | 2700                          |
| 6                         | 5                                       | 25                                | 0.095                          | 1.3                           | 156.2817             | 2850                          |
| 6                         | 5                                       | 25                                | 0.1                            | 1.5                           | 168.5725             | 3000                          |
| 6                         | 12                                      | 15                                | 0.07                           | 0.55                          | 109.785075           | 5040                          |
| 6                         | 12                                      | 15                                | 0.08                           | 0.62                          | 114.151892           | 5760                          |
| 6                         | 12                                      | 15                                | 0.09                           | 0.75                          | 122.246875           | 6480                          |
| 6                         | 12                                      | 15                                | 0.095                          | 1.05                          | 140.854075           | 6840                          |
| 6                         | 12                                      | 15                                | 0.1                            | 1.1                           | 143.9453             | 7200                          |
| 6                         | 12                                      | 25                                | 0.07                           | 0.6                           | 112.9048             | 5040                          |
| 6                         | 12                                      | 25                                | 0.08                           | 0.65                          | 116.021675           | 5760                          |
| 6                         | 12                                      | 25                                | 0.09                           | 0.85                          | 128.460675           | 6480                          |
| 6                         | 12                                      | 25                                | 0.095                          | 1.15                          | 147.033675           | 6840                          |
| 6                         | 12                                      | 25                                | 0.1                            | 1.2                           | 150.1192             | 7200                          |

## 2. Design of Experiment

Workpiece velocity, wheel velocity, cross-feed, and cutting condition have two levels each while depth of cut has five levels. The multilevel full factorial design ( $2^4 \times 5 = 80$ ) was applied to run 80 experiments for this research work. Design of Experiment (DOE) is shown in the Table S6 below.

Table S6. Data table showing design of experiment.

| Condition<br>(1—Dry,<br>2—Wet) | Cross-<br>feed,<br>$f_b$ (mm) | Workpiece<br>velocity,<br>$v_w$ (m/min) | Wheel<br>velocity,<br>$v_s$ (m/s) | Depth<br>of cut,<br>$a_p$ (mm) | Multimeter<br>reading (mV) | Temperature<br>(°C) | MRR<br>(mm <sup>3</sup> /min) | Total cost<br>(BDT) |
|--------------------------------|-------------------------------|-----------------------------------------|-----------------------------------|--------------------------------|----------------------------|---------------------|-------------------------------|---------------------|
| 1                              | 3                             | 5                                       | 15                                | 0.07                           | 2.1                        | 205.171             | 1050                          | 2.97                |
| 1                              | 3                             | 5                                       | 15                                | 0.08                           | 2.2                        | 211.231             | 1200                          | 2.89                |
| 1                              | 3                             | 12                                      | 15                                | 0.09                           | 2.35                       | 220.3               | 3240                          | 1.31                |
| 1                              | 6                             | 12                                      | 25                                | 0.07                           | 2.09                       | 204.565             | 5040                          | 0.67                |
| 1                              | 6                             | 12                                      | 25                                | 0.08                           | 2.15                       | 208.203             | 5760                          | 0.76                |
| 1                              | 6                             | 5                                       | 15                                | 0.095                          | 3.06                       | 262.876             | 2850                          | 1.6                 |
| 1                              | 6                             | 5                                       | 15                                | 0.1                            | 3.92                       | 313.677             | 3000                          | 1.68                |
| 1                              | 6                             | 5                                       | 25                                | 0.07                           | 2.43                       | 225.126             | 2100                          | 1.68                |
| 1                              | 3                             | 12                                      | 15                                | 0.08                           | 1.95                       | 196.06              | 2880                          | 1.22                |
| 1                              | 6                             | 12                                      | 25                                | 0.09                           | 2.6                        | 235.357             | 6480                          | 0.86                |
| 1                              | 3                             | 12                                      | 15                                | 0.095                          | 2.7                        | 241.36              | 3420                          | 1.25                |
| 1                              | 3                             | 5                                       | 15                                | 0.1                            | 3.8                        | 306.639             | 1500                          | 2.94                |
| 1                              | 3                             | 5                                       | 25                                | 0.07                           | 2.3                        | 217.28              | 1050                          | 2.91                |
| 1                              | 3                             | 5                                       | 25                                | 0.08                           | 2.4                        | 223.317             | 1200                          | 2.97                |
| 1                              | 3                             | 12                                      | 15                                | 0.07                           | 1.8                        | 186.923             | 2520                          | 1.25                |
| 1                              | 3                             | 12                                      | 15                                | 0.1                            | 3.5                        | 288.973             | 3600                          | 1.28                |
| 1                              | 3                             | 12                                      | 25                                | 0.09                           | 2.6                        | 235.357             | 3240                          | 1.23                |
| 1                              | 3                             | 5                                       | 15                                | 0.095                          | 3                          | 259.3               | 1425                          | 2.88                |
| 1                              | 6                             | 5                                       | 25                                | 0.08                           | 2.51                       | 229.944             | 2400                          | 1.53                |
| 1                              | 6                             | 5                                       | 25                                | 0.09                           | 3.03                       | 261.088             | 2700                          | 1.55                |
| 1                              | 3                             | 12                                      | 25                                | 0.095                          | 2.97                       | 257.511             | 3420                          | 1.28                |
| 1                              | 3                             | 12                                      | 25                                | 0.1                            | 3.73                       | 302.526             | 3600                          | 1.3                 |
| 1                              | 6                             | 5                                       | 15                                | 0.07                           | 2.25                       | 214.257             | 2100                          | 1.66                |
| 1                              | 6                             | 5                                       | 15                                | 0.08                           | 2.35                       | 220.3               | 2400                          | 1.54                |
| 1                              | 6                             | 5                                       | 25                                | 0.1                            | 3.81                       | 307.226             | 3000                          | 1.75                |
| 1                              | 6                             | 12                                      | 15                                | 0.095                          | 2.81                       | 247.95              | 6840                          | 0.79                |
| 1                              | 6                             | 12                                      | 15                                | 0.1                            | 3.55                       | 291.924             | 7200                          | 0.81                |
| 1                              | 6                             | 12                                      | 25                                | 0.095                          | 2.99                       | 258.704             | 6840                          | 0.82                |
| 1                              | 3                             | 5                                       | 25                                | 0.09                           | 2.9                        | 253.331             | 1350                          | 3                   |
| 1                              | 3                             | 5                                       | 25                                | 0.095                          | 3.3                        | 277.138             | 1425                          | 2.93                |
| 1                              | 3                             | 5                                       | 25                                | 0.1                            | 3.7                        | 300.762             | 1500                          | 2.85                |
| 1                              | 6                             | 12                                      | 15                                | 0.07                           | 1.88                       | 191.799             | 5040                          | 0.79                |
| 1                              | 6                             | 12                                      | 15                                | 0.08                           | 2.09                       | 204.565             | 5760                          | 0.74                |
| 1                              | 6                             | 12                                      | 15                                | 0.09                           | 2.4                        | 223.317             | 6480                          | 0.86                |
| 1                              | 6                             | 5                                       | 15                                | 0.09                           | 2.55                       | 232.351             | 2700                          | 1.6                 |
| 1                              | 3                             | 5                                       | 15                                | 0.09                           | 2.5                        | 229.343             | 1350                          | 3.04                |
| 1                              | 6                             | 5                                       | 25                                | 0.095                          | 3.45                       | 286.018             | 2850                          | 1.66                |
| 1                              | 3                             | 12                                      | 25                                | 0.07                           | 2                          | 199.1               | 2520                          | 1.36                |
| 1                              | 3                             | 12                                      | 25                                | 0.08                           | 2.25                       | 214.257             | 2880                          | 1.36                |
| 1                              | 6                             | 12                                      | 25                                | 0.1                            | 3.7                        | 300.762             | 7200                          | 0.79                |
| 2                              | 3                             | 5                                       | 15                                | 0.07                           | 0.7                        | 119.1357            | 1050                          | 27.51               |

|   |   |    |    |       |      |          |      |       |
|---|---|----|----|-------|------|----------|------|-------|
| 2 | 3 | 5  | 15 | 0.08  | 0.8  | 125.3552 | 1200 | 28.36 |
| 2 | 3 | 12 | 15 | 0.09  | 0.75 | 122.2469 | 3240 | 11.95 |
| 2 | 6 | 12 | 25 | 0.07  | 0.6  | 112.9048 | 5040 | 7.18  |
| 2 | 6 | 12 | 25 | 0.08  | 0.65 | 116.0217 | 5760 | 6.2   |
| 2 | 6 | 5  | 15 | 0.095 | 1.1  | 143.9453 | 2850 | 15.1  |
| 2 | 6 | 5  | 15 | 0.1   | 1.3  | 156.2817 | 3000 | 14.55 |
| 2 | 6 | 5  | 25 | 0.07  | 0.75 | 122.2469 | 2100 | 15.81 |
| 2 | 3 | 12 | 15 | 0.08  | 0.62 | 114.1519 | 2880 | 11.82 |
| 2 | 6 | 12 | 25 | 0.09  | 0.85 | 128.4607 | 6480 | 6.5   |
| 2 | 3 | 12 | 15 | 0.095 | 1.05 | 140.8541 | 3420 | 11.93 |
| 2 | 3 | 5  | 15 | 0.1   | 1.3  | 156.2817 | 1500 | 27.65 |
| 2 | 3 | 5  | 25 | 0.07  | 0.75 | 122.2469 | 1050 | 26.52 |
| 2 | 3 | 5  | 25 | 0.08  | 0.82 | 126.5977 | 1200 | 28.33 |
| 2 | 3 | 12 | 15 | 0.07  | 0.55 | 109.7851 | 2520 | 11.78 |
| 2 | 3 | 12 | 15 | 0.1   | 1.1  | 143.9453 | 3600 | 12.77 |
| 2 | 3 | 12 | 25 | 0.09  | 0.85 | 128.4607 | 3240 | 13.05 |
| 2 | 3 | 5  | 15 | 0.095 | 1.1  | 143.9453 | 1425 | 28.35 |
| 2 | 6 | 5  | 25 | 0.08  | 0.82 | 126.5977 | 2400 | 16.11 |
| 2 | 6 | 5  | 25 | 0.09  | 0.89 | 130.943  | 2700 | 16.25 |
| 2 | 3 | 12 | 25 | 0.095 | 1.15 | 147.0337 | 3420 | 12.63 |
| 2 | 3 | 12 | 25 | 0.1   | 1.2  | 150.1192 | 3600 | 11.12 |
| 2 | 6 | 5  | 15 | 0.07  | 0.7  | 119.1357 | 2100 | 14.56 |
| 2 | 6 | 5  | 15 | 0.08  | 0.8  | 125.3552 | 2400 | 14.44 |
| 2 | 6 | 5  | 25 | 0.1   | 1.5  | 168.5725 | 3000 | 15.43 |
| 2 | 6 | 12 | 15 | 0.095 | 1.05 | 140.8541 | 6840 | 8.04  |
| 2 | 6 | 12 | 15 | 0.1   | 1.1  | 143.9453 | 7200 | 7.47  |
| 2 | 6 | 12 | 25 | 0.095 | 1.15 | 147.0337 | 6840 | 6.05  |
| 2 | 3 | 5  | 25 | 0.09  | 0.89 | 130.943  | 1350 | 26.55 |
| 2 | 3 | 5  | 25 | 0.095 | 1.3  | 156.2817 | 1425 | 27.64 |
| 2 | 3 | 5  | 25 | 0.1   | 1.5  | 168.5725 | 1500 | 28.05 |
| 2 | 6 | 12 | 15 | 0.07  | 0.55 | 109.7851 | 5040 | 6.74  |
| 2 | 6 | 12 | 15 | 0.08  | 0.62 | 114.1519 | 5760 | 6.87  |
| 2 | 6 | 12 | 15 | 0.09  | 0.75 | 122.2469 | 6480 | 7.58  |
| 2 | 6 | 5  | 15 | 0.09  | 0.9  | 131.5633 | 2700 | 14.45 |
| 2 | 3 | 5  | 15 | 0.09  | 0.9  | 131.5633 | 1350 | 27.63 |
| 2 | 6 | 5  | 25 | 0.095 | 1.3  | 156.2817 | 2850 | 15.71 |
| 2 | 3 | 12 | 25 | 0.07  | 0.6  | 112.9048 | 2520 | 11.24 |
| 2 | 3 | 12 | 25 | 0.08  | 0.65 | 116.0217 | 2880 | 13.07 |
| 2 | 6 | 12 | 25 | 0.1   | 1.2  | 150.1192 | 7200 | 6.08  |

### 3. RSM calculations

$$\begin{aligned} \text{Temp}_{\text{dry}} = & 977.242 + 7.25 \times f_b - 3.36 \times v_w + 2.375 \times v_s - 21602.5 \times a_p + 145538 \times a_p^2 \\ & - 0.212 \times f_b \times v_w - 0.071 \times f_b \times v_s - 28.223 \times f_b \times a_p - 0.0042 \times v_w \times v_s \\ & + 23.7174 \times v_w \times a_p - 8.89 \times v_s \times a_p \end{aligned} \quad (\text{S2})$$

$$\begin{aligned} \text{Cost}_{\text{dry}} = & 9.4224 - 0.978 \times f_b - 0.49943 \times v_w + 0.0043143 \times v_s - 22.83 \times a_p + 97.1215 \times a_p^2 \\ & + 0.0534 \times f_b \times v_w - 0.00007 \times f_b \times v_s + 1.434 \times f_b \times a_p + 0.000157143 \times v_w \times v_s \\ & + 0.1429 \times v_w \times a_p - 0.01552 \times v_s \times a_p \end{aligned} \quad (\text{S3})$$

$$\begin{aligned} \text{Temp}_{\text{wet}} = & 423.585 + 4.63E - 14 \times f_b - 0.4011 \times v_w - 1.44345 \times v_s - 7958.2 \times a_p + 52175.4 \times a_p^2 \\ & - 2.78E - 16 \times f_b \times v_w - 3.11E - 16 \times f_b \times v_s - 4.36E - 13 \times f_b \times a_p \\ & - 0.0137251 \times v_w \times v_s - 7.89962 \times v_w \times a_p + 23.8998 \times v_s \times a_p \end{aligned} \quad (\text{S4})$$

$$\begin{aligned} \text{Cost}_{\text{wet}} = & 39.7315 - 5.84 \times f_b - 3.1523 \times v_w + 0.2445 \times v_s + 344.873 \times a_p - 1587.53 \times a_p^2 \\ & + 0.354143 \times f_b \times v_w + 0.01057 \times f_b \times v_s - 5.1552 \times f_b \times a_p - 0.01133 \times v_w \times v_s \\ & + 0.1195 \times v_w \times a_p - 2.25172 \times v_s \times a_p \end{aligned} \quad (\text{S5})$$

**Table S7.** Data table showing the calculation of temperature using Response Surface Methodology (RSM) equations.

| Dry condition          |                                   |                             |                          |            |                            | Wet condition                     |                               |                          |                         |            | Predicted Temperature      |                                        |                                        |
|------------------------|-----------------------------------|-----------------------------|--------------------------|------------|----------------------------|-----------------------------------|-------------------------------|--------------------------|-------------------------|------------|----------------------------|----------------------------------------|----------------------------------------|
| Cross-feed, $f_b$ (mm) | Workpiece velocity, $v_w$ (m/min) | Wheel velocity, $v_s$ (m/s) | Depth of cut, $a_p$ (mm) | Temp. (°C) | MRR (mm <sup>3</sup> /min) | Workpiece velocity, $v_w$ (m/min) | Wheel velocity $y, v_s$ (m/s) | Depth of cut, $a_p$ (mm) | Multimeter reading (mV) | Temp. (°C) | MRR (mm <sup>3</sup> /min) | RSM Equation, Temp <sub>dry</sub> (°C) | RSM Equation, Temp <sub>wet</sub> (°C) |
| 3                      | 5                                 | 15                          | 0.07                     | 205.17     | 1050                       | 5                                 | 15                            | 0.07                     | 0.70                    | 119.14     | 1050                       | 205.12                                 | 121.61                                 |
| 3                      | 5                                 | 15                          | 0.08                     | 211.23     | 1200                       |                                   |                               | 0.08                     | 0.80                    | 125.36     | 1200                       | 206.41                                 | 123.47                                 |
| 3                      | 5                                 | 15                          | 0.09                     | 229.34     | 1350                       |                                   |                               | 0.09                     | 0.90                    | 131.56     | 1350                       | 236.81                                 | 135.78                                 |
| 3                      | 5                                 | 15                          | 0.10                     | 259.30     | 1425                       |                                   |                               | 0.10                     | 1.10                    | 143.95     | 1425                       | 262.92                                 | 145.84                                 |
| 3                      | 5                                 | 15                          | 0.10                     | 306.64     | 1500                       |                                   |                               | 0.10                     | 1.30                    | 156.28     | 1500                       | 296.31                                 | 158.52                                 |
| 3                      | 5                                 | 25                          | 0.07                     | 217.28     | 1050                       |                                   | 25                            | 0.07                     | 0.75                    | 122.25     | 1050                       | 220.31                                 | 123.21                                 |
| 3                      | 5                                 | 25                          | 0.08                     | 223.32     | 1200                       |                                   |                               | 0.08                     | 0.82                    | 126.60     | 1200                       | 220.71                                 | 127.46                                 |
| 3                      | 5                                 | 25                          | 0.09                     | 253.33     | 1350                       |                                   |                               | 0.09                     | 0.89                    | 130.94     | 1350                       | 250.22                                 | 142.16                                 |
| 3                      | 5                                 | 25                          | 0.10                     | 277.14     | 1425                       |                                   |                               | 0.10                     | 1.30                    | 156.28     | 1425                       | 275.89                                 | 153.42                                 |
| 3                      | 5                                 | 25                          | 0.10                     | 300.76     | 1500                       |                                   |                               | 0.10                     | 1.50                    | 168.57     | 1500                       | 308.83                                 | 167.29                                 |
| 3                      | 12                                | 15                          | 0.07                     | 186.92     | 2520                       | 12                                | 15                            | 0.07                     | 0.55                    | 109.79     | 2520                       | 188.33                                 | 116.01                                 |
| 3                      | 12                                | 15                          | 0.08                     | 196.06     | 2880                       |                                   |                               | 0.08                     | 0.62                    | 114.15     | 2880                       | 191.28                                 | 117.33                                 |
| 3                      | 12                                | 15                          | 0.09                     | 220.30     | 3240                       |                                   |                               | 0.09                     | 0.75                    | 122.25     | 3240                       | 223.33                                 | 129.08                                 |
| 3                      | 12                                | 15                          | 0.10                     | 241.36     | 3420                       |                                   |                               | 0.10                     | 1.05                    | 140.85     | 3420                       | 250.28                                 | 138.87                                 |
| 3                      | 12                                | 15                          | 0.10                     | 288.97     | 3600                       |                                   |                               | 0.10                     | 1.10                    | 143.95     | 3600                       | 284.50                                 | 151.27                                 |
| 3                      | 12                                | 25                          | 0.07                     | 199.10     | 2520                       |                                   | 25                            | 0.07                     | 0.60                    | 112.90     | 2520                       | 203.22                                 | 116.65                                 |
| 3                      | 12                                | 25                          | 0.08                     | 214.26     | 2880                       |                                   |                               | 0.08                     | 0.65                    | 116.02     | 2880                       | 205.28                                 | 120.36                                 |
| 3                      | 12                                | 25                          | 0.09                     | 235.36     | 3240                       |                                   |                               | 0.09                     | 0.85                    | 128.46     | 3240                       | 236.45                                 | 134.50                                 |
| 3                      | 12                                | 25                          | 0.10                     | 257.51     | 3420                       |                                   |                               | 0.10                     | 1.15                    | 147.03     | 3420                       | 262.95                                 | 145.48                                 |
| 3                      | 12                                | 25                          | 0.10                     | 302.53     | 3600                       |                                   |                               | 0.10                     | 1.20                    | 150.12     | 3600                       | 296.72                                 | 159.07                                 |
| 6                      | 5                                 | 15                          | 0.07                     | 214.26     | 2100                       | 5                                 | 15                            | 0.07                     | 0.70                    | 119.14     | 2100                       | 214.57                                 | 121.61                                 |
| 6                      | 5                                 | 15                          | 0.08                     | 220.30     | 2400                       |                                   |                               | 0.08                     | 0.80                    | 125.36     | 2400                       | 215.01                                 | 123.47                                 |
| 6                      | 5                                 | 15                          | 0.09                     | 232.35     | 2700                       |                                   |                               | 0.09                     | 0.90                    | 131.56     | 2700                       | 244.56                                 | 135.78                                 |
| 6                      | 5                                 | 15                          | 0.10                     | 262.88     | 2850                       |                                   |                               | 0.10                     | 1.10                    | 143.95     | 2850                       | 270.25                                 | 145.84                                 |
| 6                      | 5                                 | 15                          | 0.10                     | 313.68     | 3000                       |                                   |                               | 0.10                     | 1.30                    | 156.28     | 3000                       | 303.21                                 | 158.52                                 |
| 6                      | 5                                 | 25                          | 0.07                     | 225.13     | 2100                       |                                   | 25                            | 0.07                     | 0.75                    | 122.25     | 2100                       | 227.63                                 | 123.21                                 |
| 6                      | 5                                 | 25                          | 0.08                     | 229.94     | 2400                       |                                   |                               | 0.08                     | 0.82                    | 126.60     | 2400                       | 227.18                                 | 127.46                                 |
| 6                      | 5                                 | 25                          | 0.09                     | 261.09     | 2700                       |                                   |                               | 0.09                     | 0.89                    | 130.94     | 2700                       | 255.84                                 | 142.16                                 |
| 6                      | 5                                 | 25                          | 0.10                     | 286.02     | 2850                       |                                   |                               | 0.10                     | 1.30                    | 156.28     | 2850                       | 281.08                                 | 153.42                                 |
| 6                      | 5                                 | 25                          | 0.10                     | 307.23     | 3000                       |                                   |                               | 0.10                     | 1.50                    | 168.57     | 3000                       | 313.60                                 | 167.29                                 |
| 6                      | 12                                | 15                          | 0.07                     | 191.80     | 5040                       | 12                                | 15                            | 0.07                     | 0.55                    | 109.79     | 5040                       | 193.31                                 | 116.01                                 |
| 6                      | 12                                | 15                          | 0.08                     | 204.56     | 5760                       |                                   |                               | 0.08                     | 0.62                    | 114.15     | 5760                       | 195.41                                 | 117.33                                 |
| 6                      | 12                                | 15                          | 0.09                     | 223.32     | 6480                       |                                   |                               | 0.09                     | 0.75                    | 122.25     | 6480                       | 226.62                                 | 129.08                                 |
| 6                      | 12                                | 15                          | 0.10                     | 247.95     | 6840                       |                                   |                               | 0.10                     | 1.05                    | 140.85     | 6840                       | 253.14                                 | 138.87                                 |
| 6                      | 12                                | 15                          | 0.10                     | 291.92     | 7200                       |                                   |                               | 0.10                     | 1.10                    | 143.95     | 7200                       | 286.94                                 | 151.27                                 |
| 6                      | 12                                | 25                          | 0.07                     | 204.56     | 5040                       |                                   | 25                            | 0.07                     | 0.60                    | 112.90     | 5040                       | 206.08                                 | 116.65                                 |
| 6                      | 12                                | 25                          | 0.08                     | 208.20     | 5760                       |                                   |                               | 0.08                     | 0.65                    | 116.02     | 5760                       | 207.29                                 | 120.36                                 |
| 6                      | 12                                | 25                          | 0.09                     | 235.36     | 6480                       |                                   |                               | 0.09                     | 0.85                    | 128.46     | 6480                       | 237.61                                 | 134.50                                 |
| 6                      | 12                                | 25                          | 0.10                     | 258.70     | 6840                       |                                   |                               | 0.10                     | 1.15                    | 147.03     | 6840                       | 263.68                                 | 145.48                                 |
| 6                      | 12                                | 25                          | 0.10                     | 300.76     | 7200                       |                                   |                               | 0.10                     | 1.20                    | 150.12     | 7200                       | 297.04                                 | 159.07                                 |

**Table S8.** Data table showing cost calculation under dry and wet condition using Response Surface Methodology (RSM) equations.

| Cross-feed, $f_b$ (mm) | Workpiece velocity, $v_w$ (m/min) | Wheel velocity, $v_s$ (m/s) | Depth of cut, $a_p$ (mm) | MRR (mm <sup>3</sup> /min) | Machining time (s) | Measured Machining time (s) | Power consumption, kW | Power cost, (8 BDT/kW) | Cutting Fluid Cost, (0.5 BDT/s) | Labor cost, (0.06 BDT/s) | Total cost (Utility + Labor + CF) (BDT) | Total cost (rounded) (BDT) | RSM equation for cost, Cost <sub>dry</sub> (BDT) |
|------------------------|-----------------------------------|-----------------------------|--------------------------|----------------------------|--------------------|-----------------------------|-----------------------|------------------------|---------------------------------|--------------------------|-----------------------------------------|----------------------------|--------------------------------------------------|
| 3                      | 5                                 | 15                          | 0.07                     | 1050                       | 46.8               | 49.37                       | 493.7                 | 1.10                   | 0                               | 2.96                     | 4.06                                    | 4.06                       | 4.08                                             |
| 3                      | 5                                 | 15                          | 0.08                     | 1200                       | 46.8               | 48.13                       | 481.3                 | 1.07                   | 0                               | 2.89                     | 3.96                                    | 3.96                       | 4.04                                             |
| 3                      | 5                                 | 15                          | 0.09                     | 1350                       | 46.8               | 50.58                       | 505.8                 | 1.12                   | 0                               | 3.03                     | 4.16                                    | 4.16                       | 4.03                                             |
| 3                      | 5                                 | 15                          | 0.095                    | 1425                       | 46.8               | 47.9                        | 479                   | 1.06                   | 0                               | 2.87                     | 3.94                                    | 3.94                       | 4.03                                             |
| 3                      | 5                                 | 15                          | 0.1                      | 1500                       | 46.8               | 48.9                        | 489                   | 1.09                   | 0                               | 2.93                     | 4.02                                    | 4.03                       | 4.03                                             |
| 3                      | 5                                 | 25                          | 0.07                     | 1050                       | 46.8               | 48.37                       | 483.7                 | 1.07                   | 0                               | 2.90                     | 3.98                                    | 3.98                       | 4.12                                             |
| 3                      | 5                                 | 25                          | 0.08                     | 1200                       | 46.8               | 49.39                       | 493.9                 | 1.10                   | 0                               | 2.96                     | 4.06                                    | 4.07                       | 4.08                                             |
| 3                      | 5                                 | 25                          | 0.09                     | 1350                       | 46.8               | 49.87                       | 498.7                 | 1.11                   | 0                               | 2.99                     | 4.10                                    | 4.11                       | 4.06                                             |
| 3                      | 5                                 | 25                          | 0.095                    | 1425                       | 46.8               | 48.81                       | 488.1                 | 1.08                   | 0                               | 2.93                     | 4.01                                    | 4.02                       | 4.06                                             |
| 3                      | 5                                 | 25                          | 0.1                      | 1500                       | 46.8               | 47.36                       | 473.6                 | 1.05                   | 0                               | 2.84                     | 3.89                                    | 3.9                        | 4.07                                             |
| 3                      | 12                                | 15                          | 0.07                     | 2520                       | 19.5               | 20.78                       | 207.8                 | 0.46                   | 0                               | 1.25                     | 1.71                                    | 1.71                       | 1.79                                             |
| 3                      | 12                                | 15                          | 0.08                     | 2880                       | 19.5               | 20.3                        | 203                   | 0.45                   | 0                               | 1.22                     | 1.67                                    | 1.67                       | 1.77                                             |
| 3                      | 12                                | 15                          | 0.09                     | 3240                       | 19.5               | 21.76                       | 217.6                 | 0.48                   | 0                               | 1.31                     | 1.79                                    | 1.79                       | 1.76                                             |
| 3                      | 12                                | 15                          | 0.095                    | 3420                       | 19.5               | 20.83                       | 208.3                 | 0.46                   | 0                               | 1.25                     | 1.71                                    | 1.72                       | 1.76                                             |
| 3                      | 12                                | 15                          | 0.1                      | 3600                       | 19.5               | 21.26                       | 212.6                 | 0.47                   | 0                               | 1.28                     | 1.75                                    | 1.75                       | 1.77                                             |
| 3                      | 12                                | 25                          | 0.07                     | 2520                       | 19.5               | 22.53                       | 225.3                 | 0.50                   | 0                               | 1.35                     | 1.85                                    | 1.86                       | 1.84                                             |
| 3                      | 12                                | 25                          | 0.08                     | 2880                       | 19.5               | 22.51                       | 225.1                 | 0.50                   | 0                               | 1.35                     | 1.85                                    | 1.86                       | 1.81                                             |
| 3                      | 12                                | 25                          | 0.09                     | 3240                       | 19.5               | 20.35                       | 203.5                 | 0.45                   | 0                               | 1.22                     | 1.67                                    | 1.68                       | 1.81                                             |
| 3                      | 12                                | 25                          | 0.095                    | 3420                       | 19.5               | 21.26                       | 212.6                 | 0.47                   | 0                               | 1.28                     | 1.75                                    | 1.75                       | 1.81                                             |
| 3                      | 12                                | 25                          | 0.1                      | 3600                       | 19.5               | 21.58                       | 215.8                 | 0.48                   | 0                               | 1.29                     | 1.77                                    | 1.78                       | 1.82                                             |
| 6                      | 5                                 | 15                          | 0.07                     | 2100                       | 25.2               | 27.54                       | 275.4                 | 0.61                   | 0                               | 1.65                     | 2.26                                    | 2.27                       | 2.24                                             |
| 6                      | 5                                 | 15                          | 0.08                     | 2400                       | 25.2               | 25.54                       | 255.4                 | 0.57                   | 0                               | 1.53                     | 2.10                                    | 2.1                        | 2.25                                             |
| 6                      | 5                                 | 15                          | 0.09                     | 2700                       | 25.2               | 26.52                       | 265.2                 | 0.59                   | 0                               | 1.59                     | 2.18                                    | 2.19                       | 2.28                                             |
| 6                      | 5                                 | 15                          | 0.095                    | 2850                       | 25.2               | 26.53                       | 265.3                 | 0.59                   | 0                               | 1.59                     | 2.18                                    | 2.19                       | 2.30                                             |
| 6                      | 5                                 | 15                          | 0.1                      | 3000                       | 25.2               | 27.96                       | 279.6                 | 0.62                   | 0                               | 1.68                     | 2.30                                    | 2.3                        | 2.33                                             |
| 6                      | 5                                 | 25                          | 0.07                     | 2100                       | 25.2               | 27.96                       | 279.6                 | 0.62                   | 0                               | 1.68                     | 2.30                                    | 2.3                        | 2.28                                             |
| 6                      | 5                                 | 25                          | 0.08                     | 2400                       | 25.2               | 25.49                       | 254.9                 | 0.57                   | 0                               | 1.53                     | 2.10                                    | 2.1                        | 2.29                                             |
| 6                      | 5                                 | 25                          | 0.09                     | 2700                       | 25.2               | 25.72                       | 257.2                 | 0.57                   | 0                               | 1.54                     | 2.11                                    | 2.12                       | 2.31                                             |
| 6                      | 5                                 | 25                          | 0.095                    | 2850                       | 25.2               | 27.55                       | 275.5                 | 0.61                   | 0                               | 1.65                     | 2.27                                    | 2.27                       | 2.33                                             |
| 6                      | 5                                 | 25                          | 0.1                      | 3000                       | 25.2               | 29.01                       | 290.1                 | 0.64                   | 0                               | 1.74                     | 2.39                                    | 2.39                       | 2.36                                             |
| 6                      | 12                                | 15                          | 0.07                     | 5040                       | 10.5               | 13.05                       | 130.5                 | 0.29                   | 0                               | 0.78                     | 1.07                                    | 1.08                       | 1.08                                             |
| 6                      | 12                                | 15                          | 0.08                     | 5760                       | 10.5               | 12.27                       | 122.7                 | 0.27                   | 0                               | 0.74                     | 1.01                                    | 1.01                       | 1.09                                             |
| 6                      | 12                                | 15                          | 0.09                     | 6480                       | 10.5               | 14.3                        | 143                   | 0.32                   | 0                               | 0.86                     | 1.18                                    | 1.18                       | 1.13                                             |
| 6                      | 12                                | 15                          | 0.095                    | 6840                       | 10.5               | 13.06                       | 130.6                 | 0.29                   | 0                               | 0.78                     | 1.07                                    | 1.08                       | 1.16                                             |
| 6                      | 12                                | 15                          | 0.1                      | 7200                       | 10.5               | 13.34                       | 133.4                 | 0.30                   | 0                               | 0.80                     | 1.10                                    | 1.1                        | 1.19                                             |
| 6                      | 12                                | 25                          | 0.07                     | 5040                       | 10.5               | 11.04                       | 110.4                 | 0.25                   | 0                               | 0.66                     | 0.91                                    | 0.91                       | 1.12                                             |
| 6                      | 12                                | 25                          | 0.08                     | 5760                       | 10.5               | 12.58                       | 125.8                 | 0.28                   | 0                               | 0.75                     | 1.03                                    | 1.04                       | 1.14                                             |
| 6                      | 12                                | 25                          | 0.09                     | 6480                       | 10.5               | 14.3                        | 143                   | 0.32                   | 0                               | 0.86                     | 1.18                                    | 1.18                       | 1.18                                             |
| 6                      | 12                                | 25                          | 0.095                    | 6840                       | 10.5               | 13.53                       | 135.3                 | 0.30                   | 0                               | 0.81                     | 1.11                                    | 1.12                       | 1.20                                             |
| 6                      | 12                                | 25                          | 0.1                      | 7200                       | 10.5               | 13.07                       | 130.7                 | 0.29                   | 0                               | 0.78                     | 1.07                                    | 1.08                       | 1.23                                             |
| 3                      | 5                                 | 15                          | 0.07                     | 1050                       | 46.8               | 49.11                       | 491.1                 | 1.09                   | 24.555                          | 2.95                     | 28.59                                   | 28.6                       | 28.01                                            |
| 3                      | 5                                 | 15                          | 0.08                     | 1200                       | 46.8               | 50.63                       | 506.3                 | 1.13                   | 25.315                          | 3.04                     | 29.48                                   | 29.48                      | 28.59                                            |
| 3                      | 5                                 | 15                          | 0.09                     | 1350                       | 46.8               | 49.33                       | 493.3                 | 1.10                   | 24.665                          | 2.96                     | 28.72                                   | 28.73                      | 28.86                                            |
| 3                      | 5                                 | 15                          | 0.095                    | 1425                       | 46.8               | 50.62                       | 506.2                 | 1.12                   | 25.31                           | 3.04                     | 29.47                                   | 29.48                      | 28.87                                            |
| 3                      | 5                                 | 15                          | 0.1                      | 1500                       | 46.8               | 49.37                       | 493.7                 | 1.10                   | 24.685                          | 2.96                     | 28.74                                   | 28.75                      | 28.80                                            |
| 3                      | 5                                 | 25                          | 0.07                     | 1050                       | 46.8               | 47.34                       | 473.4                 | 1.05                   | 23.67                           | 2.84                     | 27.56                                   | 27.57                      | 28.63                                            |
| 3                      | 5                                 | 25                          | 0.08                     | 1200                       | 46.8               | 50.58                       | 505.8                 | 1.12                   | 25.29                           | 3.03                     | 29.45                                   | 29.45                      | 28.99                                            |
| 3                      | 5                                 | 25                          | 0.09                     | 1350                       | 46.8               | 47.4                        | 474                   | 1.05                   | 23.7                            | 2.84                     | 27.60                                   | 27.6                       | 29.03                                            |
| 3                      | 5                                 | 25                          | 0.095                    | 1425                       | 46.8               | 49.35                       | 493.5                 | 1.10                   | 24.675                          | 2.96                     | 28.73                                   | 28.74                      | 28.93                                            |
| 3                      | 5                                 | 25                          | 0.1                      | 1500                       | 46.8               | 50.08                       | 500.8                 | 1.11                   | 25.04                           | 3.00                     | 29.16                                   | 29.16                      | 28.75                                            |
| 3                      | 12                                | 15                          | 0.07                     | 2520                       | 19.5               | 21.02                       | 210.2                 | 0.47                   | 10.51                           | 1.26                     | 12.24                                   | 12.24                      | 12.25                                            |
| 3                      | 12                                | 15                          | 0.08                     | 2880                       | 19.5               | 21.09                       | 210.9                 | 0.47                   | 10.545                          | 1.27                     | 12.28                                   | 12.28                      | 12.84                                            |
| 3                      | 12                                | 15                          | 0.09                     | 3240                       | 19.5               | 21.33                       | 213.3                 | 0.47                   | 10.665                          | 1.28                     | 12.42                                   | 12.42                      | 13.11                                            |
| 3                      | 12                                | 15                          | 0.095                    | 3420                       | 19.5               | 21.29                       | 212.9                 | 0.47                   | 10.645                          | 1.28                     | 12.40                                   | 12.4                       | 13.13                                            |
| 3                      | 12                                | 15                          | 0.1                      | 3600                       | 19.5               | 22.79                       | 227.9                 | 0.51                   | 11.395                          | 1.37                     | 13.27                                   | 13.27                      | 13.07                                            |

---

|   |    |    |       |      |      |       |       |      |        |      |       |       |       |
|---|----|----|-------|------|------|-------|-------|------|--------|------|-------|-------|-------|
| 3 | 12 | 25 | 0.07  | 2520 | 19.5 | 20.07 | 200.7 | 0.45 | 10.035 | 1.20 | 11.69 | 11.69 | 12.08 |
| 3 | 12 | 25 | 0.08  | 2880 | 19.5 | 23.33 | 233.3 | 0.52 | 11.665 | 1.40 | 13.58 | 13.59 | 12.44 |
| 3 | 12 | 25 | 0.09  | 3240 | 19.5 | 23.29 | 232.9 | 0.52 | 11.645 | 1.40 | 13.56 | 13.56 | 12.49 |
| 3 | 12 | 25 | 0.095 | 3420 | 19.5 | 22.55 | 225.5 | 0.50 | 11.275 | 1.35 | 13.13 | 13.13 | 12.39 |
| 3 | 12 | 25 | 0.1   | 3600 | 19.5 | 19.85 | 198.5 | 0.44 | 9.925  | 1.19 | 11.56 | 11.56 | 12.22 |
| 6 | 5  | 15 | 0.07  | 2100 | 25.2 | 25.99 | 259.9 | 0.58 | 12.995 | 1.56 | 15.13 | 15.14 | 15.20 |
| 6 | 5  | 15 | 0.08  | 2400 | 25.2 | 25.78 | 257.8 | 0.57 | 12.89  | 1.55 | 15.01 | 15.01 | 15.62 |
| 6 | 5  | 15 | 0.09  | 2700 | 25.2 | 25.79 | 257.9 | 0.57 | 12.895 | 1.55 | 15.02 | 15.02 | 15.73 |
| 6 | 5  | 15 | 0.095 | 2850 | 25.2 | 26.96 | 269.6 | 0.60 | 13.48  | 1.62 | 15.70 | 15.7  | 15.67 |
| 6 | 5  | 15 | 0.1   | 3000 | 25.2 | 25.98 | 259.8 | 0.58 | 12.99  | 1.56 | 15.13 | 15.13 | 15.52 |
| 6 | 5  | 25 | 0.07  | 2100 | 25.2 | 28.22 | 282.2 | 0.63 | 14.11  | 1.69 | 16.43 | 16.44 | 16.13 |
| 6 | 5  | 25 | 0.08  | 2400 | 25.2 | 28.76 | 287.6 | 0.64 | 14.38  | 1.73 | 16.74 | 16.75 | 16.34 |
| 6 | 5  | 25 | 0.09  | 2700 | 25.2 | 29.01 | 290.1 | 0.64 | 14.505 | 1.74 | 16.89 | 16.9  | 16.22 |
| 6 | 5  | 25 | 0.095 | 2850 | 25.2 | 28.04 | 280.4 | 0.62 | 14.02  | 1.68 | 16.33 | 16.33 | 16.04 |
| 6 | 5  | 25 | 0.1   | 3000 | 25.2 | 27.55 | 275.5 | 0.61 | 13.775 | 1.65 | 16.04 | 16.05 | 15.79 |
| 6 | 12 | 15 | 0.07  | 5040 | 10.5 | 12.03 | 120.3 | 0.27 | 6.015  | 0.72 | 7.00  | 7.01  | 6.87  |
| 6 | 12 | 15 | 0.08  | 5760 | 10.5 | 12.26 | 122.6 | 0.27 | 6.13   | 0.74 | 7.14  | 7.14  | 7.31  |
| 6 | 12 | 15 | 0.09  | 6480 | 10.5 | 13.52 | 135.2 | 0.30 | 6.76   | 0.81 | 7.87  | 7.88  | 7.43  |
| 6 | 12 | 15 | 0.095 | 6840 | 10.5 | 14.35 | 143.5 | 0.32 | 7.175  | 0.86 | 8.35  | 8.36  | 7.37  |
| 6 | 12 | 15 | 0.1   | 7200 | 10.5 | 13.33 | 133.3 | 0.30 | 6.665  | 0.80 | 7.76  | 7.77  | 7.23  |
| 6 | 12 | 25 | 0.07  | 5040 | 10.5 | 12.81 | 128.1 | 0.28 | 6.405  | 0.77 | 7.46  | 7.46  | 7.02  |
| 6 | 12 | 25 | 0.08  | 5760 | 10.5 | 11.06 | 110.6 | 0.25 | 5.53   | 0.66 | 6.44  | 6.44  | 7.23  |
| 6 | 12 | 25 | 0.09  | 6480 | 10.5 | 11.59 | 115.9 | 0.26 | 5.795  | 0.70 | 6.75  | 6.75  | 7.12  |
| 6 | 12 | 25 | 0.095 | 6840 | 10.5 | 10.79 | 107.9 | 0.24 | 5.395  | 0.65 | 6.28  | 6.29  | 6.95  |
| 6 | 12 | 25 | 0.1   | 7200 | 10.5 | 10.84 | 108.4 | 0.24 | 5.42   | 0.65 | 6.31  | 6.32  | 6.69  |

---



Table S9. Data table showing the calculation of desirability at dry condition.

| Cross-feed, $f_b$ (mm) | Workpiece velocity, $v_w$ (m/min) | Wheel velocity, $v_s$ (m/s) | Depth of cut, $a_p$ (mm) | Temp. (°C) | MRR (mm <sup>3</sup> /min) | Total cost (BDT) | Individual desirability |                            |            | Overall Desirability       |          |          |
|------------------------|-----------------------------------|-----------------------------|--------------------------|------------|----------------------------|------------------|-------------------------|----------------------------|------------|----------------------------|----------|----------|
|                        |                                   |                             |                          |            |                            |                  | Temp. (°C)              | MRR (mm <sup>3</sup> /min) | Total cost | 33:33:33 (Equal Weightage) | 40:40:20 | 15:25:60 |
| 3                      | 5                                 | 15                          | 0.07                     | 205.171    | 1050                       | 4.06             | 0.533                   | 0                          | 0.89       | 0                          | 0        | 0        |
| 3                      | 5                                 | 15                          | 0.08                     | 211.231    | 1200                       | 3.96             | 0.527                   | 0.025                      | 0.891      | 0.228                      | 0.193    | 0.338    |
| 3                      | 5                                 | 15                          | 0.09                     | 229.343    | 1350                       | 4.16             | 0.377                   | 0.049                      | 0.891      | 0.255                      | 0.236    | 0.38     |
| 3                      | 5                                 | 15                          | 0.095                    | 259.3      | 1425                       | 3.94             | 0.249                   | 0.061                      | 0.891      | 0.239                      | 0.237    | 0.377    |
| 3                      | 5                                 | 15                          | 0.1                      | 306.639    | 1500                       | 4.03             | 0.086                   | 0.074                      | 0.891      | 0.179                      | 0.207    | 0.337    |
| 3                      | 5                                 | 25                          | 0.07                     | 217.28     | 1050                       | 3.98             | 0.458                   | 0                          | 0.888      | 0                          | 0        | 0        |
| 3                      | 5                                 | 25                          | 0.08                     | 223.317    | 1200                       | 4.07             | 0.456                   | 0.025                      | 0.89       | 0.217                      | 0.187    | 0.33     |
| 3                      | 5                                 | 25                          | 0.09                     | 253.331    | 1350                       | 4.11             | 0.312                   | 0.049                      | 0.89       | 0.24                       | 0.227    | 0.369    |
| 3                      | 5                                 | 25                          | 0.095                    | 277.138    | 1425                       | 4.02             | 0.186                   | 0.061                      | 0.89       | 0.217                      | 0.223    | 0.361    |
| 3                      | 5                                 | 25                          | 0.1                      | 300.762    | 1500                       | 3.9              | 0.024                   | 0.074                      | 0.89       | 0.117                      | 0.16     | 0.278    |
| 3                      | 12                                | 15                          | 0.07                     | 186.923    | 2520                       | 1.71             | 0.615                   | 0.24                       | 0.969      | 0.524                      | 0.507    | 0.639    |
| 3                      | 12                                | 15                          | 0.08                     | 196.06     | 2880                       | 1.67             | 0.601                   | 0.298                      | 0.97       | 0.559                      | 0.55     | 0.673    |
| 3                      | 12                                | 15                          | 0.09                     | 220.3      | 3240                       | 1.79             | 0.444                   | 0.357                      | 0.97       | 0.537                      | 0.557    | 0.672    |
| 3                      | 12                                | 15                          | 0.095                    | 241.36     | 3420                       | 1.72             | 0.311                   | 0.386                      | 0.97       | 0.489                      | 0.535    | 0.65     |
| 3                      | 12                                | 15                          | 0.1                      | 288.973    | 3600                       | 1.75             | 0.144                   | 0.415                      | 0.97       | 0.388                      | 0.472    | 0.59     |
| 3                      | 12                                | 25                          | 0.07                     | 199.1      | 2520                       | 1.86             | 0.542                   | 0.24                       | 0.968      | 0.502                      | 0.494    | 0.627    |
| 3                      | 12                                | 25                          | 0.08                     | 214.257    | 2880                       | 1.86             | 0.532                   | 0.298                      | 0.969      | 0.536                      | 0.537    | 0.66     |
| 3                      | 12                                | 25                          | 0.09                     | 235.357    | 3240                       | 1.68             | 0.379                   | 0.357                      | 0.969      | 0.509                      | 0.539    | 0.656    |
| 3                      | 12                                | 25                          | 0.095                    | 257.511    | 3420                       | 1.75             | 0.249                   | 0.386                      | 0.969      | 0.454                      | 0.511    | 0.628    |
| 3                      | 12                                | 25                          | 0.1                      | 302.526    | 3600                       | 1.78             | 0.084                   | 0.415                      | 0.969      | 0.324                      | 0.424    | 0.544    |
| 6                      | 5                                 | 15                          | 0.07                     | 214.257    | 2100                       | 2.27             | 0.487                   | 0.171                      | 0.954      | 0.431                      | 0.42     | 0.562    |
| 6                      | 5                                 | 15                          | 0.08                     | 220.3      | 2400                       | 2.1              | 0.484                   | 0.22                       | 0.953      | 0.467                      | 0.463    | 0.597    |
| 6                      | 5                                 | 15                          | 0.09                     | 232.351    | 2700                       | 2.19             | 0.339                   | 0.269                      | 0.953      | 0.444                      | 0.468    | 0.595    |
| 6                      | 5                                 | 15                          | 0.095                    | 262.876    | 2850                       | 2.19             | 0.213                   | 0.293                      | 0.951      | 0.391                      | 0.441    | 0.567    |
| 6                      | 5                                 | 15                          | 0.1                      | 313.677    | 3000                       | 2.3              | 0.052                   | 0.318                      | 0.951      | 0.251                      | 0.344    | 0.468    |
| 6                      | 5                                 | 25                          | 0.07                     | 225.126    | 2100                       | 2.3              | 0.423                   | 0.171                      | 0.953      | 0.411                      | 0.408    | 0.55     |
| 6                      | 5                                 | 25                          | 0.08                     | 229.944    | 2400                       | 2.1              | 0.425                   | 0.22                       | 0.952      | 0.447                      | 0.451    | 0.585    |
| 6                      | 5                                 | 25                          | 0.09                     | 261.088    | 2700                       | 2.12             | 0.284                   | 0.269                      | 0.951      | 0.418                      | 0.451    | 0.579    |
| 6                      | 5                                 | 25                          | 0.095                    | 286.018    | 2850                       | 2.27             | 0.16                    | 0.293                      | 0.95       | 0.355                      | 0.416    | 0.542    |
| 6                      | 5                                 | 25                          | 0.1                      | 307.226    | 3000                       | 2.39             | 0.001                   | 0.318                      | 0.95       | 0.068                      | 0.156    | 0.259    |
| 6                      | 12                                | 15                          | 0.07                     | 191.799    | 5040                       | 1.08             | 0.591                   | 0.649                      | 0.995      | 0.726                      | 0.756    | 0.827    |
| 6                      | 12                                | 15                          | 0.08                     | 204.565    | 5760                       | 1.01             | 0.58                    | 0.766                      | 0.994      | 0.762                      | 0.805    | 0.86     |
| 6                      | 12                                | 15                          | 0.09                     | 223.317    | 6480                       | 1.18             | 0.427                   | 0.883                      | 0.992      | 0.721                      | 0.8      | 0.85     |
| 6                      | 12                                | 15                          | 0.095                    | 247.95     | 6840                       | 1.08             | 0.297                   | 0.942                      | 0.992      | 0.653                      | 0.764    | 0.818    |
| 6                      | 12                                | 15                          | 0.1                      | 291.924    | 7200                       | 1.1              | 0.132                   | 1                          | 0.991      | 0.508                      | 0.665    | 0.735    |
| 6                      | 12                                | 25                          | 0.07                     | 204.565    | 5040                       | 0.91             | 0.528                   | 0.649                      | 0.993      | 0.699                      | 0.739    | 0.813    |
| 6                      | 12                                | 25                          | 0.08                     | 208.203    | 5760                       | 1.04             | 0.522                   | 0.766                      | 0.992      | 0.735                      | 0.787    | 0.845    |
| 6                      | 12                                | 25                          | 0.09                     | 235.357    | 6480                       | 1.18             | 0.373                   | 0.883                      | 0.991      | 0.689                      | 0.779    | 0.832    |
| 6                      | 12                                | 25                          | 0.095                    | 258.704    | 6840                       | 1.12             | 0.246                   | 0.942                      | 0.99       | 0.613                      | 0.735    | 0.794    |
| 6                      | 12                                | 25                          | 0.1                      | 300.762    | 7200                       | 1.08             | 0.082                   | 1                          | 0.989      | 0.434                      | 0.604    | 0.683    |

Table S10. Data table showing the calculation of desirability at wet condition.

| Cross-feed, $f_b$ (mm) | Workpiece velocity, $v_w$ (m/min) | Wheel velocity, $v_s$ (m/s) | Depth of cut, $a_p$ (mm) | Temp. (°C) | MRR (mm <sup>3</sup> /min) | Total cost (BDT) | Individual desirability |                            |            | Overall Desirability       |          |          |
|------------------------|-----------------------------------|-----------------------------|--------------------------|------------|----------------------------|------------------|-------------------------|----------------------------|------------|----------------------------|----------|----------|
|                        |                                   |                             |                          |            |                            |                  | Temp. (°C)              | MRR (mm <sup>3</sup> /min) | Total cost | 33:33:33 (Equal Weightage) | 40:40:20 | 15:25:60 |
| 6                      | 12                                | 25                          | 0.1                      | 300.762    | 7200                       | 1.08             | 0.082                   | 1                          | 0.989      | 0.434                      | 0.604    | 0.683    |
| 3                      | 5                                 | 15                          | 0.07                     | 119.136    | 1050                       | 28.6             | 0.951                   | 0                          | 0.052      | 0                          | 0        | 0        |
| 3                      | 5                                 | 15                          | 0.08                     | 125.355    | 1200                       | 29.48            | 0.942                   | 0.025                      | 0.031      | 0.091                      | 0.057    | 0.05     |
| 3                      | 5                                 | 15                          | 0.09                     | 131.563    | 1350                       | 28.73            | 0.882                   | 0.049                      | 0.022      | 0.099                      | 0.064    | 0.047    |
| 3                      | 5                                 | 15                          | 0.095                    | 143.945    | 1425                       | 29.48            | 0.832                   | 0.061                      | 0.022      | 0.104                      | 0.069    | 0.049    |
| 3                      | 5                                 | 15                          | 0.1                      | 156.282    | 1500                       | 28.75            | 0.77                    | 0.074                      | 0.024      | 0.112                      | 0.076    | 0.054    |
| 3                      | 5                                 | 25                          | 0.07                     | 122.247    | 1050                       | 27.57            | 0.943                   | 0                          | 0.03       | 0                          | 0        | 0        |
| 3                      | 5                                 | 25                          | 0.08                     | 126.598    | 1200                       | 29.45            | 0.923                   | 0.025                      | 0.018      | 0.075                      | 0.046    | 0.036    |
| 3                      | 5                                 | 25                          | 0.09                     | 130.943    | 1350                       | 27.6             | 0.85                    | 0.049                      | 0.016      | 0.088                      | 0.056    | 0.039    |
| 3                      | 5                                 | 25                          | 0.095                    | 156.282    | 1425                       | 28.74            | 0.795                   | 0.061                      | 0.02       | 0.1                        | 0.066    | 0.046    |
| 3                      | 5                                 | 25                          | 0.1                      | 168.573    | 1500                       | 29.16            | 0.727                   | 0.074                      | 0.026      | 0.113                      | 0.077    | 0.056    |
| 3                      | 12                                | 15                          | 0.07                     | 109.785    | 2520                       | 12.24            | 0.991                   | 0.24                       | 0.603      | 0.524                      | 0.461    | 0.517    |
| 3                      | 12                                | 15                          | 0.08                     | 114.152    | 2880                       | 12.28            | 0.985                   | 0.298                      | 0.583      | 0.556                      | 0.496    | 0.534    |
| 3                      | 12                                | 15                          | 0.09                     | 122.247    | 3240                       | 12.42            | 0.927                   | 0.357                      | 0.573      | 0.575                      | 0.523    | 0.548    |
| 3                      | 12                                | 15                          | 0.095                    | 140.854    | 3420                       | 12.4             | 0.879                   | 0.386                      | 0.572      | 0.58                       | 0.533    | 0.553    |
| 3                      | 12                                | 15                          | 0.1                      | 143.945    | 3600                       | 13.27            | 0.818                   | 0.415                      | 0.575      | 0.581                      | 0.542    | 0.559    |
| 3                      | 12                                | 25                          | 0.07                     | 112.905    | 2520                       | 11.69            | 0.988                   | 0.24                       | 0.61       | 0.526                      | 0.463    | 0.52     |
| 3                      | 12                                | 25                          | 0.08                     | 116.022    | 2880                       | 13.59            | 0.97                    | 0.298                      | 0.597      | 0.558                      | 0.499    | 0.54     |
| 3                      | 12                                | 25                          | 0.09                     | 128.461    | 3240                       | 13.56            | 0.9                     | 0.357                      | 0.595      | 0.577                      | 0.527    | 0.558    |
| 3                      | 12                                | 25                          | 0.095                    | 147.034    | 3420                       | 13.13            | 0.847                   | 0.386                      | 0.598      | 0.581                      | 0.539    | 0.565    |
| 3                      | 12                                | 25                          | 0.1                      | 150.119    | 3600                       | 11.56            | 0.78                    | 0.415                      | 0.605      | 0.582                      | 0.548    | 0.572    |
| 6                      | 5                                 | 15                          | 0.07                     | 119.136    | 2100                       | 15.14            | 0.951                   | 0.171                      | 0.5        | 0.434                      | 0.371    | 0.422    |
| 6                      | 5                                 | 15                          | 0.08                     | 125.355    | 2400                       | 15.01            | 0.942                   | 0.22                       | 0.485      | 0.466                      | 0.404    | 0.44     |
| 6                      | 5                                 | 15                          | 0.09                     | 131.563    | 2700                       | 15.02            | 0.882                   | 0.269                      | 0.481      | 0.486                      | 0.431    | 0.456    |
| 6                      | 5                                 | 15                          | 0.095                    | 143.945    | 2850                       | 15.7             | 0.832                   | 0.293                      | 0.484      | 0.491                      | 0.442    | 0.464    |
| 6                      | 5                                 | 15                          | 0.1                      | 156.282    | 3000                       | 15.13            | 0.77                    | 0.318                      | 0.489      | 0.494                      | 0.451    | 0.471    |
| 6                      | 5                                 | 25                          | 0.07                     | 122.247    | 2100                       | 16.44            | 0.943                   | 0.171                      | 0.467      | 0.423                      | 0.36     | 0.404    |
| 6                      | 5                                 | 25                          | 0.08                     | 126.598    | 2400                       | 16.75            | 0.923                   | 0.22                       | 0.46       | 0.455                      | 0.394    | 0.425    |
| 6                      | 5                                 | 25                          | 0.09                     | 130.943    | 2700                       | 16.9             | 0.85                    | 0.269                      | 0.465      | 0.475                      | 0.422    | 0.444    |
| 6                      | 5                                 | 25                          | 0.095                    | 156.282    | 2850                       | 16.33            | 0.795                   | 0.293                      | 0.471      | 0.48                       | 0.433    | 0.453    |
| 6                      | 5                                 | 25                          | 0.1                      | 168.573    | 3000                       | 16.05            | 0.727                   | 0.318                      | 0.48       | 0.481                      | 0.443    | 0.461    |
| 6                      | 12                                | 15                          | 0.07                     | 109.785    | 5040                       | 7.01             | 0.991                   | 0.649                      | 0.792      | 0.799                      | 0.765    | 0.78     |
| 6                      | 12                                | 15                          | 0.08                     | 114.152    | 5760                       | 7.14             | 0.985                   | 0.766                      | 0.776      | 0.837                      | 0.81     | 0.802    |
| 6                      | 12                                | 15                          | 0.09                     | 122.247    | 6480                       | 7.88             | 0.927                   | 0.883                      | 0.772      | 0.859                      | 0.845    | 0.821    |
| 6                      | 12                                | 15                          | 0.095                    | 140.854    | 6840                       | 8.36             | 0.879                   | 0.942                      | 0.774      | 0.863                      | 0.859    | 0.829    |
| 6                      | 12                                | 15                          | 0.1                      | 143.945    | 7200                       | 7.77             | 0.818                   | 1                          | 0.779      | 0.861                      | 0.87     | 0.836    |
| 6                      | 12                                | 25                          | 0.07                     | 112.905    | 5040                       | 7.46             | 0.988                   | 0.649                      | 0.787      | 0.797                      | 0.763    | 0.776    |
| 6                      | 12                                | 25                          | 0.08                     | 116.022    | 5760                       | 6.44             | 0.97                    | 0.766                      | 0.779      | 0.834                      | 0.809    | 0.802    |
| 6                      | 12                                | 25                          | 0.09                     | 128.461    | 6480                       | 6.75             | 0.9                     | 0.883                      | 0.783      | 0.854                      | 0.845    | 0.824    |
| 6                      | 12                                | 25                          | 0.095                    | 147.034    | 6840                       | 6.29             | 0.847                   | 0.942                      | 0.789      | 0.858                      | 0.86     | 0.834    |
| 6                      | 12                                | 25                          | 0.1                      | 150.119    | 7200                       | 6.32             | 0.78                    | 1                          | 0.798      | 0.854                      | 0.87     | 0.842    |
